# Supplementary material
Source: MDPI journal article supplement (https://www.mdpi.com/2071-1050/12/17/6898)
Supplement: s1 [file s1]

Table S1 Conversion factors from physical unit to coal equivalent

|                   | Firewood | Coal   | LPG    | Gasoline | Electricity | Solar  | Biogas             |
|-------------------|----------|--------|--------|----------|-------------|--------|--------------------|
|                   | kg/kg    | kg/kg  | kg/kg  | kg/kg    | kg/kWh      | kg/MJ  | kg/m <sup>3</sup>  |
|                   | kgC/kg   | kgC/kg | kgC/kg | kgC/kg   | kgC/kWh     | kgC/MJ | kgC/m <sup>3</sup> |
| Conversion factor | 0.571    | 0.714  | 1.714  | 1.471    | 0.404       | 0.034  | 0.714              |

Table S2. Family characteristics.

|      | ALTEs /m              | DIST /km | hNUM    | INCOME /Yuan | FARM /ha | FOREST /ha | ECOLAND /ha |
|------|-----------------------|----------|---------|--------------|----------|------------|-------------|
| Min  | 0.0                   | 12.3     | 1       | 300          | 0.00     | 0.00       | 0.00        |
| Mean | 603.8                 | 40.1     | 3.7     | 62453        | 0.41     | 0.05       | 0.89        |
| Max  | 1129.5                | 99.2     | 10.0    | 360000       | 1.68     | 16.75      | 68.34       |
|      | hAREA /m <sup>2</sup> | PIG      | ElecApp | A65          | A14      | aFEMALE    | Livelihood  |
| Min  | 20.0                  | 0.0      | 1.0     | 0%           | 0%       | 0.00       | 0.0         |
| Mean | 200.8                 | 1.5      | 12.3    | 44%          | 57%      | 0.40       | 2.9         |
| Max  | 5.0                   | 70.0     | 58.0    | 2%           | 37.5%    | 1.00       | 7.0         |

ALTEs: altitude; Dist: distance to county; hNUM: number of permanent resident population; INCOME: household annual income; FARM: farmland area; FOREST: economic forest area; ECOLAND: ecological forest area; hAREA: house area; PIG: number of raised pigs; ElecApp: number of household appliances; A65: percentage of members aged over 65; A14: percentage of members aged below 14; aFEMALE: percentage of adult female members; Livelihood: diversity of livelihood; egyT: total amount of household energy consumption.

Table S3 Overall situation of rural household energy consumption

|                 | Firewood | Coal     | LPG     | Gasoline | Electricity | Solar  | Biogas |
|-----------------|----------|----------|---------|----------|-------------|--------|--------|
| Min kg ce       | 0        | 0        | 0       | 0        | 0           | 0      | 0      |
| Mean kg ce      | 2742.00  | 174.00   | 58.33   | 405.80   | 933.90      | 0.05   | 6.05   |
| Max kg ce       | 52103.80 | 12857.00 | 3087.45 | 30719.90 | 6787.20     | 1.56   | 625.46 |
| Popularity rate | 84.34%   | 21.20%   | 20.72%  | 41.20%   | 99.04%      | 12.05% | 3.86%  |
